# Supplementary material
Source: ML conference proceedings conference paper supplement (https://openaccess.thecvf.com/content/CVPR2024/html/Chen_GenTron_Diffusion_Transformers_CVPR_2024_paper.html)
Supplement: Supplementary file 1 [file Chen_GenTron_Diffusion_Transformers_CVPR_2024_supplemental.pdf]

| Method                 | Text Encoder           | Integration     |
|------------------------|------------------------|-----------------|
| single text encoder    |                        |                 |
| GLIDE [43]             | CLIP-B [51]            | cross-attention |
| SDv1.4 / SDv1.5        | CLIP-L [51]            | cross-attention |
| SDv2.0 / SDv2.1        | OpenCLIP-H [32]        | cross-attention |
| DALL-E 2 [52]          | CLIP [51]              | cross-attention |
| DALL-E 3 [4]           | T5-XXL [13]            | cross-attention |
| Imagen [57]            | T5-XXL [13]            | cross-attention |
| DeepFloyd IF [59]      | T5-XXL                 | cross-attention |
| DiT [45]               | N/A                    | adaLN           |
| PixArt- $\alpha$ [10]  | T5-XXL [13]            | cross-attention |
| multiple text encoders |                        |                 |
| eDiff-I [2]            | CLIP-L & T5-XXL        | cross-attention |
| SDXL [47]              | CLIP-L & OpenCLIP-bigG | cross-attention |
| Emu [15]               | CLIP-L & T5-XXL        | cross-attention |

Table 5. Summary of conditioning strategies used by existing image diffusion models.

## A. Summary of Conditioning Mechanism

In Table 5, we present a summary of the conditioning approaches utilized in existing text-to-image diffusion models. Pioneering studies, such as [44, 52], have leveraged CLIP’s language model to guide text-based image generation. Furthermore, Saharia *et al.* [57] found that large, generic language models, pretrained solely on text, are adept at encoding text for image generation purposes. Additionally, more recently, there has been an emerging trend towards combining different language models to achieve more comprehensive guidance [2, 15, 47]. In this work, we use the interleaved cross-attention method for scenarios involving multiple text encoders, while reserving plain cross-attention for cases with a single text encoder. The interleaved cross-attention technique is a specialized adaptation of standard cross-attention, specifically engineered to facilitate the integration of two distinct types of textual embeddings. This method upholds the fundamental structure of traditional cross-attention, yet distinctively alternates between different text embeddings in a sequential order. For example, in one transformer block, our approach might employ CLIP embeddings, and then in the subsequent block, it would switch to using Flan-T5 embeddings.

## B. More Results

### B.1. Additional Model Scaling-up Examples

We present additional qualitative results of model scaling up in Figure 9. All prompts are from the PartiPrompt [68].

### C. Additional GenTron-T2I Examples

We present more GenTron-T2I example in Figure 10.

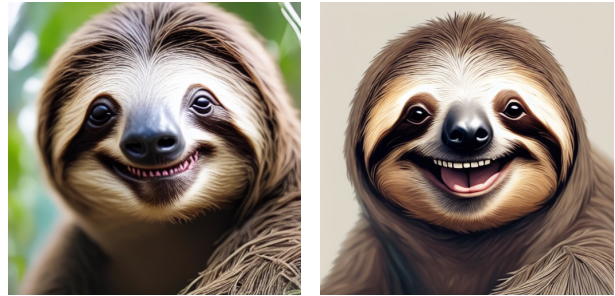

“a smiling sloth”

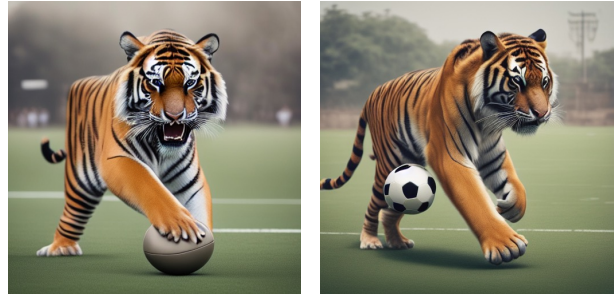

“A tiger is playing football”

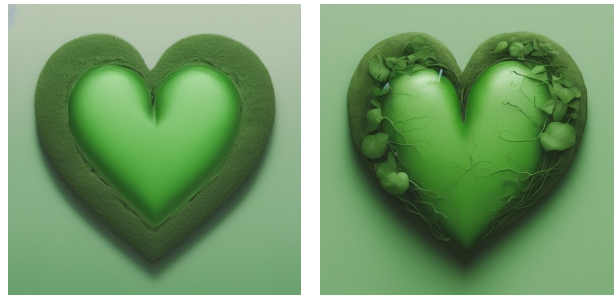

“A green heart”

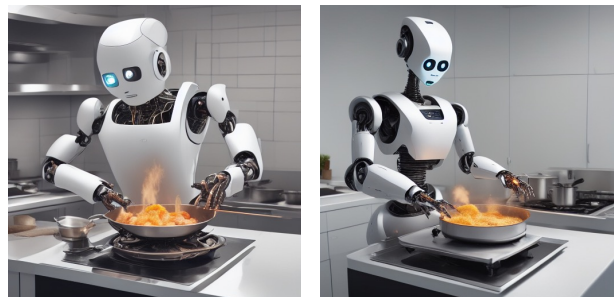

“a robot cooking”

GenTron-XL/2

GenTron-G/2

Figure 9. More examples of model scaling-up effects. Both models use the CLIP-T5XXL conditioning strategy. Captions are from PartiPrompt [68].

### D. Additional GenTron-T2V Examples

Additional GenTron-T2V results are available on our website<sup>1</sup>.



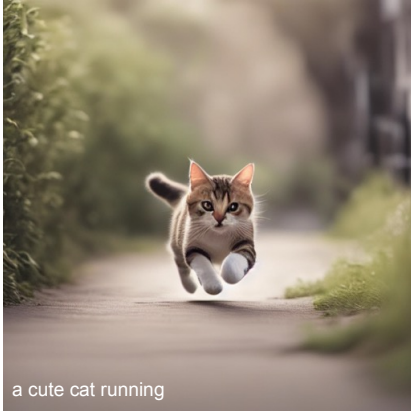

a cute cat running

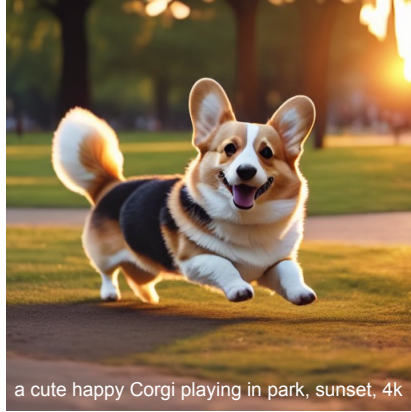

a cute happy Corgi playing in park, sunset, 4k

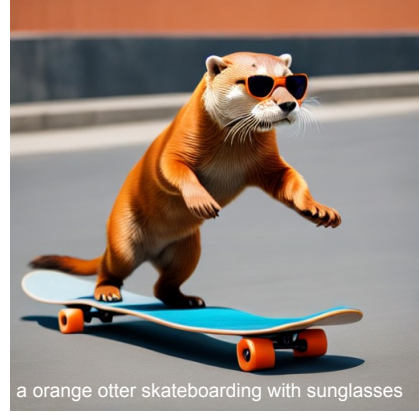

a orange otter skateboarding with sunglasses

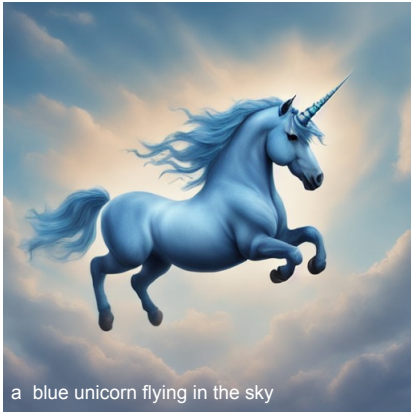

a blue unicorn flying in the sky

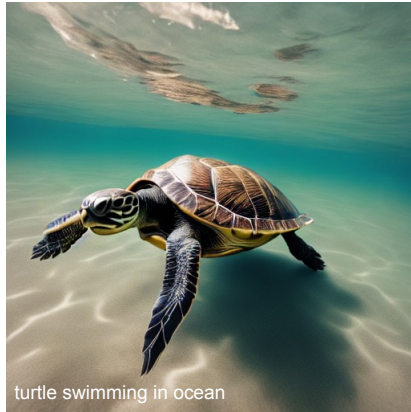

turtle swimming in ocean

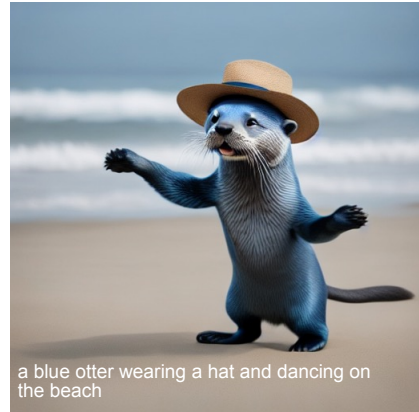

a blue otter wearing a hat and dancing on the beach

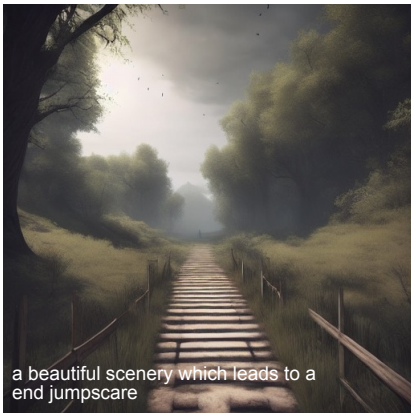

a beautiful scenery which leads to a end jumpscare

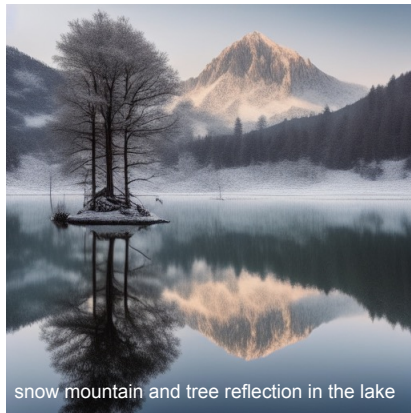

snow mountain and tree reflection in the lake

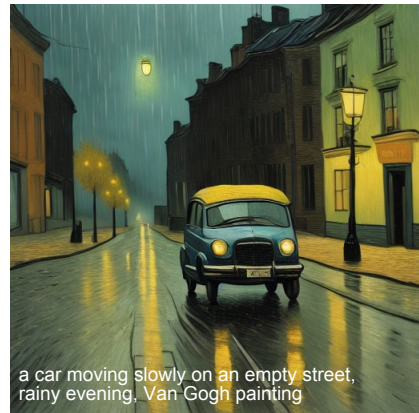

a car moving slowly on an empty street, rainy evening, Van-Gogh painting

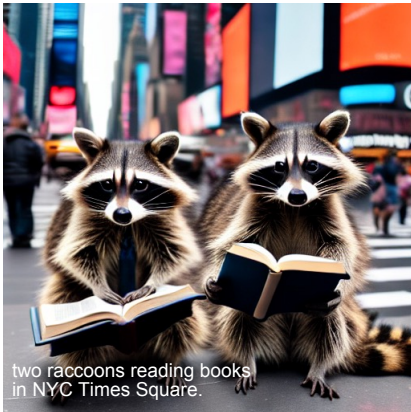

two raccoons reading books in NYC Times Square.

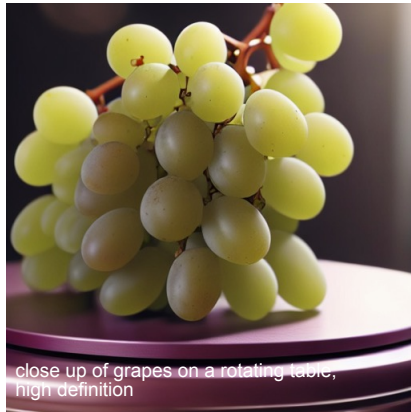

close up of grapes on a rotating table, high definition

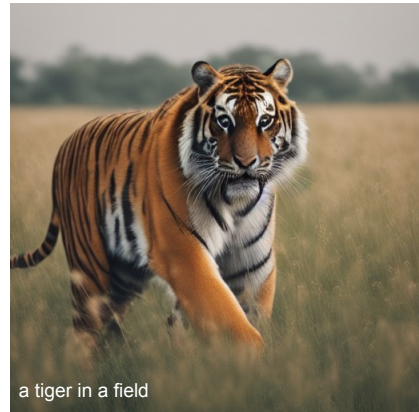

a tiger in a field

Figure 10. GenTron-T2I examples.
